# Supplementary material for: Synaptotagmin 7 docks synaptic vesicles to support facilitation and Doc2α-triggered asynchronous release
Source: eLife. 2024 Mar 27;12:RP90632. doi: 10.7554/eLife.90632 (PMC10972563; doi:10.7554/eLife.90632)
Supplement: Figure 1—figure supplement 1—source data 1. [file elife-90632-fig1-figsupp1-data1.xlsx]

## Sheet: Sheet1
B	One phase decay			C		WT	Doc2αKO	syt7KO
	Best-fit values					0.250699	0.232729	0.180333
	Y0	0.2488				0.225729	0.221785	0.2212
	Plateau	0.006303				0.266984	0.275973	0.274732
	K	0.01998				0.167209	0.173984	0.199162
	Half Life	34.7				0.254699	0.11874	0.228283
	Tau	50.06				0.128513	0.238691	0.284214
	Span	0.2425				0.248941	0.231915	0.226771
						0.275863	0.218643	0.240402
						0.225747	0.237915	0.280422
						0.286979	0.248893	0.25388
						0.243441	0.256682	0.193299
						0.242886	0.272617	0.210171
						0.236251	0.23563	0.246554
						0.222338	0.251033	0.196895
						0.232072	0.276698	0.217619
							0.20388
							0.286028
					Mean	0.2339	0.2342	0.2303
					SEM	0.01038	0.009969	0.008432
					Dunnett's test P value		0.9996	0.9516
