# Supplementary material for: Synaptotagmin 7 docks synaptic vesicles to support facilitation and Doc2α-triggered asynchronous release
Source: eLife. 2024 Mar 27;12:RP90632. doi: 10.7554/eLife.90632 (PMC10972563; doi:10.7554/eLife.90632)
Supplement: Figure 1—source data 1. [file elife-90632-fig1-data1.xlsx]

## Sheet: Sheet1
C		No. of boutons					D		WT	Doc2αKO	syt7KO	EGTA-AM
	Binning time	WT	Doc2αKO	Syt7KO	EGTA-AM				38.7009	18.7585	41.6344	10.6709
	10 ms	640	1260	792	968				34.3118	15.0423	39.101	13.3586
	20 ms	230	210	264	121				35.3061	16.5116	35.3437	13.5664
	30 ms	90	23	96	11				39.881	14.3429	29.5949	9.30811
	40 ms	20	7	24	0				36.6288	17.5076	29.4916	15.4284
	50 ms	10	0	18	0				38.3782	14.5306	40.7934	11.1191
	60 ms	8	0	6	0				32.0572	16.0357	29.4117	12.5242
	70 ms	2	0	1	0				36.8878	17.1945	29.5997	12.9656
									34.7147	18.3454	36.2047	13.2828
									38.3435	18.7557	31.7961	9.93218
									33.9802	16.2833	41.0136	12.7579
									37.3703	12.7628	37.0953	12.5857
									33.4592	14.4429	30.1797	9.13828
									33.1079	12.7306	31.9091	8.83298
									32.5185	14.7878	29.5671	11.4885
										19.05		14.7511
										20.1964		17.1722
												16.1937
								Minimum	32.06	12.73	29.41	8.833
								25% Percentile	33.46	14.49	29.59	10.49
								Median	35.31	16.28	31.91	12.67
								75% Percentile	38.34	18.55	39.1	13.86
								Maximum	39.88	20.2	41.63	17.17
								Range	7.824	7.466	12.22	8.339
								Mean	35.71	16.31	34.18	12.5
								SEM	0.6431	0.5454	1.233	0.5708
								Dunnett's test, P value		<0.0001	0.3925	<0.0001
										***		***
