# Supplementary material for: Synaptotagmin 7 docks synaptic vesicles to support facilitation and Doc2α-triggered asynchronous release
Source: eLife. 2024 Mar 27;12:RP90632. doi: 10.7554/eLife.90632 (PMC10972563; doi:10.7554/eLife.90632)
Supplement: Figure 2—source data 1. [file elife-90632-fig2-data1.xlsx]

## Sheet: Sheet1
D		EPSC amplitude, nA					Fast EPSC charge, pC					Slow EPSC charge, pC					Fast EPSC τ, ms					Slow EPSC τ, ms
		WT	Doc2αKO	syt7KO	EGTA-AM		WT	Doc2αKO	syt7KO	EGTA-AM		WT	Doc2αKO	syt7KO	EGTA-AM		WT	Doc2αKO	syt7KO	EGTA-AM		WT	Doc2αKO	syt7KO	EGTA-AM
		0.929871	0.808411	1.05804	0.947478		10.5758	14.3608	19.7995	12.6077		7.58985	2.78265	3.97797	1.77146		8.68278	13.5048	12.0205	9.93162		195.218	180.595	193.784	194.995
		1.06028	0.930176	1.05255	0.633774		16.3177	17.4708	14.4448	10.9193		6.23621	2.75002	5.17584	1.73507		9.94949	9.44989	8.9703	10.1437		188.326	193.782	194.963	191.497
		1.00341	0.902617	1.11145	0.759913		19.4492	16.4693	11.2001	17.9866		6.73974	3.16054	4.39153	2.40303		11.8282	8.37617	8.83449	11.3398		190.459	181.377	189.011	205.002
		1.16709	1.20453	1.11298	0.703948		15.5574	18.882	12.6548	15.4713		4.82879	3.59954	5.70359	1.1419		14.7025	8.75759	11.7909	11.9604		190.065	187.649	181.676	175.785
		1.07279	1.15387	1.15021	0.920027		21.8961	19.0082	14.1463	10.9196		6.06955	3.828	5.02772	1.22639		14.7542	11.3123	13.3308	7.67379		180.59	192.477	184.58	197.766
		1.1157	1.18439	0.767822	0.772566		21.3106	19.7131	15.9895	12.3381		8.8933	3.81506	7.78234	1.29476		9.10329	10.313	14.2909	11.6595		187.698	197.273	178.267	189.546
		1.08805	1.17011	1.0041	0.964259		20.0979	19.8066	12.6959	14.3972		6.56211	4.02251	7.64149	1.66459		14.7941	9.46162	9.30542	11.8068		174.622	198.982	163.048	191.595
		1.11401	0.756543	0.8977	0.672739		17.3554	15.0645	16.0681	16.2217		6.41836	1.74872	3.73705	2.41335		14.7002	12.8158	12.0267	11.218		189.063	188.68	176.516	178.638
		0.92385	0.635071	0.918812	0.975521		17.2579	8.89868	17.141	16.5583		4.79693	1.96817	6.82036	2.36572		11.3976	11.0968	11.4102	12.2124		170.859	178.466	170.767	168.402
		0.789888	0.77179	0.714321	0.658216		12.2762	9.37644	12.2953	12.9269		6.23783	1.30225	4.71104	1.1028		13.602	10.8481	8.57379	9.68202		177.477	178.732	179.923	156.732
		0.764417	0.62	0.8971	0.654427		10.7865	12.7247	11.2624	12.914		6.99474	1.26257	5.40276	1.67874		8.9932	13.4204	10.5902	12.6502		171.247	181.438	181.564	169.493
		0.724412	0.85	0.799561	0.947717		16.198	11.6062	13.0371	12.7018		7.30316	2.28702	5.96542	1.89569		10.9523	9.00087	9.50553	11.7924		172.623	196.018	188.854	198.747
		0.598289	0.798	0.935364	0.831882		17.0754	10.765	13.2559	16.2004		5.71489	2.2178	7.74232	1.70856		14.4101	12.3004	13.4246	11.8892		192.233	181.357	182.133	188.624
		0.581426	0.993	0.901184	0.819944		16.8369	14.789	14.2993	17.954		5.55765	1.9871	5.37985	2.11666		13.5455	12.2761	10.4295	12.2309		188.76	195.357	199.238	206.326
		0.668608	0.921	0.912781	0.657982		8.42203	15.1178	15.1278	9.88962		9.0327	2.0875	7.92374	2.06755		14.7164	9.66312	11.7769	12.8641		178.562	181.088	180.093	190.551
		0.997		0.643921	0.941212		17.0765		10.9466	15.242		3.71134		4.85655	1.49637		12.5902		9.52702	6.34592		195.656		195.498	193.774
		0.948		0.809631	0.848822		14.3742		12.6986	12.1179		8.45694		6.65494	1.73381		8.24998		12.2323	12.9137		170.93		196.346	207.831
		0.9587		0.771179	0.740381		15.4321		18.03	15.9335		8.61441		6.49852	1.02633		13.9439		10.1304	12.8376		181.846		197.374	195.045
				0.74521	0.8053				10.3893	12.2313		7.95863		5.92607	2.67291				12.5553	7.96191				181.689	196.899
					0.760723					11.7716		4.05279		6.64147	1.28419					6.79718					190.998
	Mean	0.917	0.9133	0.9055	0.8008		16.02	14.94	13.97	13.87		6.588	2.588	5.898	1.74		12.27	10.84	11.09	10.8		183.1	187.6	185	189.4
	SEM	0.04369	0.05001	0.03374	0.02623		0.8656	0.9477	0.5845	0.5412		0.3473	0.2376	0.2874	0.1081		0.5691	0.4442	0.3923	0.4651		2.051	1.935	2.227	2.985
	Dunnett's test, P value		0.9999	0.9928	0.0763			0.6261	0.1195	0.0899			<0.0001	0.152	<0.0001			0.1142	0.1889	0.07			0.4685	0.8987	0.1553
													***		***
