# Supplementary material for: Synaptotagmin 7 docks synaptic vesicles to support facilitation and Doc2α-triggered asynchronous release
Source: eLife. 2024 Mar 27;12:RP90632. doi: 10.7554/eLife.90632 (PMC10972563; doi:10.7554/eLife.90632)
Supplement: Figure 3—figure supplement 1—source data 1. [file elife-90632-fig3-figsupp1-data1.xlsx]

## Sheet: Sheet1
B	Δt=50 ms	Mean_50 ms	SEM_50 ms	Dunnett's test P value
	WT	1.31	0.0775
	Doc2αKO	1.28	0.0829	0.9191
	syt7KO	0.52	0.0252	<0.0001	***
	Δt=100 ms	Mean_100 ms	SEM_100 ms	Dunnett's test P value
	WT	1.04	0.0588
	Doc2αKO	1.03	0.0406	0.9953
	syt7KO	0.57	0.0338	<0.0001	***
