# Supplementary material for: Synaptotagmin 7 docks synaptic vesicles to support facilitation and Doc2α-triggered asynchronous release
Source: eLife. 2024 Mar 27;12:RP90632. doi: 10.7554/eLife.90632 (PMC10972563; doi:10.7554/eLife.90632)
Supplement: Figure 3—figure supplement 2—source data 1. [file elife-90632-fig3-figsupp2-data1.xlsx]

## Sheet: Sheet1
A	1st pulse	2nd pulse	Ratio			Total number of boutons
	AR	AR	0.498375			Code:	The bouton responses		the bouton responses
	AR	no AR	0.171181			2	only AR		1st pulse	2nd pulse	3rd pulse	Bouton No.
	no AR	AR	0.180932			1	only SR		0	1	1	1
	no AR	no AR	0.149512			0	no response		0	1	2	3
						3	SR+AR		0	1	3	1
	2nd pulse	3rd pulse	Ratio						0	2	1	1
	AR	AR	0.523294						0	2	2	4
	AR	no AR	0.156013			List of Abbreviations			0	2	3	1
	no AR	AR	0.170098			AR	asynchronous release		0	3	2	1
	no AR	no AR	0.150596			SR	synchronous release		0	3	3	1
									1	0	0	1
B	For all three of the first stimuli in a 10 Hz train:								1	0	2	1
	Responses	Percent	No. of boutons out of 923						1	1	1	78
	AR only	5.53	51						1	1	2	16
	SR only	8.45	78						1	1	3	37
	AR	40.4	373						1	2	0	1
									1	2	1	18
									1	2	2	20
									1	2	3	22
									1	3	1	37
									1	3	2	20
									1	3	3	41
									2	0	2	1
									2	0	3	2
									2	1	0	2
									2	1	1	11
									2	1	2	15
									2	1	3	26
									2	2	0	2
									2	2	1	16
									2	2	2	51
									2	2	3	43
									2	3	1	26
									2	3	2	44
									2	3	3	67
									3	0	3	2
									3	1	1	46
									3	1	2	14
									3	1	3	39
									3	2	0	1
									3	2	1	15
									3	2	2	27
									3	2	3	21
									3	3	1	27
									3	3	2	37
									3	3	3	83
											sum	923
