# Supplementary material for: Synaptotagmin 7 docks synaptic vesicles to support facilitation and Doc2α-triggered asynchronous release
Source: eLife. 2024 Mar 27;12:RP90632. doi: 10.7554/eLife.90632 (PMC10972563; doi:10.7554/eLife.90632)
Supplement: Figure 3—source data 1. [file elife-90632-fig3-data1.xlsx]

## Sheet: Sheet1
C		10 Hz							20 Hz							D		10 Hz							20 Hz
		WT		Doc2αKO		syt7KO			WT		Doc2αKO		syt7KO					WT		Doc2αKO		syt7KO			WT		Doc2αKO		syt7KO
	Stimulation No.	Mean	SEM	Mean	SEM	Mean	SEM		Mean	SEM	Mean	SEM	Mean	SEM			Stimulation No.	Mean	SEM	Mean	SEM	Mean	SEM		Mean	SEM	Mean	SEM	Mean	SEM
	1	0.102752	0.00631543	0.0419767	0.00788939	0.095769	0.00928342		0.0983356	0.00925292	0.0308179	0.00904258	0.0936271	0.00627326			1	1	0	1	0	1	0		1	0	1	0	1	0
	2	0.122701	0.00427892	0.0591261	0.0135683	0.0896087	0.00859524		0.121327	0.00980234	0.0369487	0.00789658	0.0783884	0.00936751			2	1.03819	0.0587562	1.03307	0.0405976	0.569578	0.033763		1.30952	0.0775152	1.27589	0.0829328	0.519929	0.0251547
	3	0.144749	0.0072809	0.0490734	0.0123915	0.107673	0.0135056		0.132596	0.0163364	0.0634017	0.0147391	0.0998008	0.00669378			3	0.692773	0.0387864	0.859906	0.0447144	0.437064	0.0162059		0.836049	0.0976488	1.1714	0.0651412	0.335406	0.0387576
	4	0.124886	0.0119792	0.0585757	0.0114083	0.0888071	0.0145531		0.147457	0.0173726	0.0666375	0.0148711	0.0913271	0.00902678			4	0.687476	0.0338279	0.868004	0.0442033	0.434651	0.0232529		0.616714	0.0647751	1.03014	0.0736771	0.348639	0.05166
	5	0.136134	0.014885	0.0407457	0.0107821	0.102865	0.0102396		0.138806	0.0168921	0.062953	0.013444	0.107254	0.00985796			5	0.650331	0.0287803	0.751029	0.042268	0.425794	0.024521		0.583661	0.081172	0.847236	0.0545887	0.311532	0.0372942
	6	0.125275	0.0102916	0.0355186	0.00969672	0.0971675	0.00972195		0.131864	0.0186864	0.0620609	0.0123656	0.0932884	0.00732699			6	0.629771	0.0300146	0.750248	0.0448937	0.440008	0.0229949		0.574487	0.0621729	0.769749	0.0524039	0.3463	0.0521709
	7	0.119535	0.0188914	0.0438004	0.0102986	0.0780897	0.0158869		0.129018	0.0148864	0.0745544	0.0144191	0.107194	0.00723096			7	0.557271	0.0266733	0.777995	0.0548269	0.386002	0.0248091		0.583439	0.0821188	0.716373	0.0449493	0.318998	0.0472474
	8	0.144499	0.016233	0.0357339	0.00678964	0.0826179	0.0122854		0.137972	0.014713	0.0621554	0.0150152	0.0996559	0.00714537			8	0.602903	0.029818	0.726491	0.0388049	0.412201	0.0197497		0.595872	0.0591546	0.729263	0.0480704	0.304037	0.0449266
	9	0.134489	0.0130925	0.0415642	0.00889964	0.103281	0.0180747		0.124117	0.0102385	0.0642834	0.0127312	0.0954037	0.00885189			9	0.557026	0.0344634	0.69735	0.0396579	0.410356	0.0272259		0.579427	0.0529563	0.681576	0.0477088	0.263356	0.0270273
	10	0.113604	0.00951085	0.0582341	0.0128254	0.0960991	0.0171769		0.139515	0.0154955	0.0728046	0.0118239	0.102033	0.011608			10	0.595334	0.0290282	0.729766	0.0353918	0.399028	0.0196337		0.547448	0.0488185	0.642441	0.0466652	0.298698	0.0326494
	11	0.133144	0.00928472	0.0412374	0.011138	0.0871834	0.0171968		0.145719	0.012767	0.0726124	0.012551	0.104918	0.0102705			11	0.582201	0.028944	0.683216	0.0272986	0.355392	0.0243811		0.542553	0.0534349	0.626007	0.049036	0.294103	0.0370644
	12	0.134223	0.0150279	0.0416508	0.0092946	0.0998511	0.0167169		0.147572	0.0103404	0.0634427	0.0132688	0.112408	0.0133384			12	0.589274	0.0360095	0.641406	0.0333176	0.406637	0.0259076		0.529633	0.0645858	0.604826	0.0394448	0.241019	0.0423893
	13	0.156308	0.0199937	0.0478392	0.0099399	0.100299	0.0196202		0.13925	0.014006	0.0786106	0.0194608	0.100918	0.0110894			13	0.562942	0.0325351	0.680319	0.0342353	0.374907	0.0243714		0.500501	0.0489334	0.617036	0.0562413	0.246672	0.0436739
	14	0.125483	0.012288	0.0607545	0.0144779	0.0947144	0.0203159		0.142537	0.0131665	0.0844401	0.0173889	0.119937	0.00924152			14	0.562774	0.0333663	0.616732	0.025985	0.341959	0.0207311		0.51121	0.0545236	0.581302	0.0608671	0.266853	0.0292715
	15	0.134724	0.0143416	0.0551166	0.0187332	0.0930022	0.0168523		0.160881	0.0156073	0.06308	0.00805828	0.0940941	0.00791926			15	0.564442	0.0351842	0.621231	0.0251009	0.367318	0.0177559		0.514084	0.0592532	0.577581	0.0584353	0.283046	0.0459111
	16	0.15317	0.0202023	0.0633011	0.0130907	0.0977066	0.0193277		0.157334	0.0134005	0.0892378	0.0136207	0.116685	0.0186678			16	0.518215	0.028046	0.605889	0.0271929	0.337544	0.0196597		0.520663	0.0646752	0.57101	0.04898	0.280264	0.0476339
	17	0.175958	0.0204885	0.0591117	0.0125453	0.0874481	0.0165231		0.155272	0.014256	0.0876955	0.0183142	0.139577	0.0154648			17	0.5324	0.0286081	0.579133	0.0363301	0.33455	0.0181627		0.486401	0.0608387	0.577606	0.042555	0.29084	0.0521729
	18	0.14838	0.020805	0.0522561	0.0120957	0.111125	0.0196678		0.160491	0.0221048	0.0767005	0.0196431	0.103652	0.0105763			18	0.493161	0.0220786	0.556498	0.0249653	0.354704	0.0250066		0.484693	0.0526522	0.561976	0.0363615	0.284471	0.0417232
	19	0.144811	0.0154454	0.0818825	0.0206909	0.0978132	0.0183573		0.15664	0.0137433	0.0807614	0.015567	0.116291	0.0214689			19	0.496822	0.0303297	0.564244	0.0327864	0.309876	0.0211413		0.482253	0.0497501	0.53677	0.060007	0.267141	0.0395076
	20	0.158321	0.0214318	0.0461184	0.012654	0.0983803	0.01493		0.168786	0.0192888	0.0612473	0.0169337	0.13417	0.032531			20	0.503581	0.0313895	0.540483	0.0359739	0.342195	0.016626		0.509939	0.0615842	0.527947	0.0441272	0.273081	0.0271139
	21	0.134055	0.0131368	0.0523057	0.0106226	0.100015	0.0230016		0.167485	0.0156381	0.102752	0.0191038	0.129036	0.0167066			21	0.412677	0.0226939	0.550483	0.0310571	0.338402	0.0229285		0.520941	0.0692164	0.49395	0.0483859	0.25109	0.0353359
	22	0.149889	0.0243769	0.0612379	0.0126048	0.11408	0.0202237		0.157162	0.0114603	0.0757547	0.0197534	0.118049	0.0100014			22	0.454891	0.0264001	0.499924	0.0315249	0.313944	0.0203482		0.473464	0.0637639	0.512863	0.0353562	0.268695	0.0387192
	23	0.161162	0.01924	0.0762173	0.0150107	0.101823	0.0181114		0.179313	0.0107993	0.0907202	0.0182513	0.124978	0.0127704			23	0.465107	0.0309814	0.454335	0.0313077	0.31594	0.0260522		0.48634	0.0595765	0.511108	0.0396791	0.279761	0.0368574
	24	0.153899	0.0112019	0.0463537	0.0118629	0.0760756	0.0198873		0.15529	0.018753	0.0800499	0.0212494	0.12495	0.00966069			24	0.410313	0.0359059	0.448935	0.0286043	0.290948	0.0233711		0.418788	0.0458652	0.43998	0.0391575	0.295959	0.0462042
	25	0.14405	0.0109845	0.0784755	0.0172393	0.10454	0.0142262		0.159097	0.0133322	0.075563	0.0115579	0.115755	0.00857675			25	0.421589	0.0308652	0.453316	0.0292184	0.274183	0.0221016		0.504208	0.0699435	0.48771	0.0559455	0.267793	0.0298973
	26	0.148669	0.00832354	0.0714884	0.0176041	0.0846225	0.0160008		0.171918	0.0168552	0.0777603	0.0172076	0.127733	0.0108609			26	0.426106	0.0259431	0.424117	0.0258542	0.271974	0.0191867		0.514006	0.0630419	0.515166	0.0302712	0.251673	0.0372736
	27	0.162906	0.0204061	0.0606671	0.0185501	0.0895206	0.0174765		0.175229	0.0123864	0.105813	0.0185463	0.111469	0.0101514			27	0.411684	0.0261024	0.464211	0.0332841	0.273392	0.0227803		0.410452	0.0651371	0.46314	0.0421123	0.242484	0.0380544
	28	0.155475	0.00968513	0.0833327	0.0173959	0.110817	0.0212276		0.177136	0.0154429	0.0830184	0.0140709	0.122491	0.0101823			28	0.414758	0.0247388	0.458294	0.0350118	0.282147	0.0158102		0.477922	0.0672677	0.506346	0.0344636	0.300393	0.04824
	29	0.169596	0.0177275	0.0482386	0.017059	0.0857908	0.0160146		0.185709	0.0156094	0.0939296	0.0144187	0.110186	0.0135245			29	0.42429	0.0297815	0.417944	0.0313135	0.260492	0.0211407		0.438325	0.0502664	0.436366	0.0361484	0.305323	0.0435834
	30	0.165305	0.0138861	0.0732318	0.015814	0.0997554	0.0189594		0.187776	0.0159068	0.0801724	0.0131096	0.0941325	0.0105142			30	0.368348	0.0243312	0.413756	0.0334786	0.268933	0.0189289		0.456277	0.0750739	0.458983	0.0494014	0.241873	0.0313879
	31	0.154709	0.0159785	0.0867316	0.0190686	0.0975098	0.0140224		0.183781	0.0141053	0.106763	0.0215475	0.130159	0.0117395			31	0.340158	0.0206512	0.361487	0.0260326	0.238123	0.0188584		0.475112	0.0510532	0.444153	0.0420602	0.248787	0.0380678
	32	0.166059	0.0190699	0.075112	0.0153381	0.0917848	0.0192124		0.193525	0.0212676	0.118449	0.0197776	0.119893	0.00530214			32	0.361175	0.0170751	0.339753	0.0310275	0.264801	0.0222415		0.449483	0.0699127	0.429179	0.0329186	0.238044	0.0377258
	33	0.189231	0.0238164	0.108363	0.0253808	0.10217	0.0128795		0.190674	0.0155722	0.10684	0.0166552	0.12269	0.00851749			33	0.351408	0.0228323	0.362241	0.0319643	0.244174	0.0217845		0.465817	0.0444968	0.471625	0.0392729	0.253586	0.0346555
	34	0.193122	0.0223837	0.0490907	0.0094168	0.111082	0.0241457		0.183517	0.0146331	0.0874808	0.0186183	0.116715	0.0138768			34	0.349471	0.024058	0.376766	0.0304412	0.250903	0.0175272		0.500921	0.0607308	0.411588	0.0257621	0.276222	0.0367475
	35	0.178524	0.0233999	0.0659712	0.012743	0.118762	0.0219272		0.20616	0.0159643	0.104049	0.0195229	0.143817	0.0143609			35	0.336569	0.0217036	0.354757	0.0282909	0.217417	0.0206866		0.436571	0.0567376	0.423872	0.055301	0.262423	0.0260164
	36	0.181344	0.0220386	0.124208	0.0197362	0.122406	0.0146775		0.195869	0.0171549	0.108577	0.0240658	0.13535	0.00702977			36	0.325806	0.0228025	0.317057	0.0268963	0.225163	0.021334		0.433908	0.0511033	0.38912	0.0274744	0.252553	0.0289403
	37	0.204356	0.0266234	0.0802311	0.0253221	0.101536	0.0219875		0.199841	0.0119462	0.0937031	0.0133321	0.129848	0.0165249			37	0.301475	0.0165957	0.377171	0.0297569	0.228652	0.0227488		0.491311	0.060917	0.462178	0.0467607	0.247448	0.0252198
	38	0.170647	0.0125316	0.10294	0.0155439	0.0938149	0.0197722		0.191771	0.0144428	0.0855211	0.0172302	0.121874	0.0107723			38	0.304034	0.0197396	0.343405	0.0283263	0.234454	0.0213578		0.404689	0.0510527	0.440505	0.0411821	0.257379	0.0316102
	39	0.194876	0.0227723	0.080902	0.0237632	0.0900112	0.0155904		0.191806	0.0152037	0.113065	0.0100995	0.116616	0.0116406			39	0.302019	0.0196481	0.309422	0.0332603	0.236845	0.0202396		0.508674	0.0714847	0.393225	0.0379896	0.249859	0.0386144
	40	0.19187	0.0223307	0.0773205	0.0179053	0.0875463	0.014528		0.206428	0.0143526	0.100291	0.0109491	0.141959	0.00736127			40	0.300231	0.0249682	0.321862	0.0317722	0.238072	0.0193964		0.473253	0.0661323	0.448148	0.0460291	0.240549	0.0278783
	41	0.221651	0.0259571	0.0550445	0.0135799	0.128015	0.02343		0.193554	0.0138098	0.091508	0.0185581	0.137475	0.00744828			41	0.305418	0.0227407	0.341126	0.028788	0.242573	0.0192236		0.460159	0.0497616	0.373204	0.0395748	0.221013	0.0374086
	42	0.192376	0.0110939	0.0899295	0.0249872	0.109484	0.0159287		0.205103	0.014813	0.137225	0.0205524	0.121876	0.0086841			42	0.310011	0.0306885	0.333811	0.0367255	0.199506	0.0196316		0.397423	0.0489966	0.433488	0.0356081	0.250396	0.0311384
	43	0.194401	0.0185734	0.0843636	0.0229135	0.0894166	0.020031		0.203765	0.0134918	0.105709	0.020302	0.106553	0.0080382			43	0.274586	0.0193551	0.299997	0.0267966	0.226817	0.0181331		0.446252	0.0471295	0.420147	0.0493986	0.234536	0.0238919
	44	0.186686	0.0210467	0.100244	0.0192996	0.0939156	0.0219204		0.228366	0.0147785	0.13443	0.0197723	0.12282	0.00932049			44	0.263876	0.0190564	0.322111	0.0274713	0.192612	0.0185988		0.408345	0.0507568	0.403776	0.0319495	0.240865	0.0216476
	45	0.195943	0.0239864	0.102117	0.0279844	0.127266	0.0192349		0.200814	0.0170103	0.133707	0.0212839	0.114294	0.0145218			45	0.293165	0.0178037	0.307227	0.0279121	0.218423	0.0218597		0.442329	0.0715926	0.423255	0.0276069	0.26406	0.0322799
	46	0.182228	0.0134421	0.114351	0.0241109	0.0960225	0.018263		0.218943	0.0167072	0.108997	0.0153491	0.152634	0.0106047			46	0.283971	0.0242599	0.315315	0.0213896	0.220423	0.01888		0.44513	0.0485488	0.419325	0.0312519	0.25028	0.033381
	47	0.207112	0.0131626	0.0665797	0.0183633	0.0846056	0.0157595		0.222699	0.0135687	0.100038	0.0150481	0.113085	0.00899509			47	0.262006	0.0220401	0.285146	0.0288849	0.214266	0.0178864		0.422934	0.0578518	0.390974	0.0474512	0.254276	0.0254113
	48	0.196305	0.0150613	0.124305	0.00831529	0.0897252	0.0207236		0.212062	0.0152976	0.110745	0.0155786	0.111528	0.0114279			48	0.276723	0.0288862	0.314632	0.0273574	0.206809	0.0197247		0.48301	0.0662239	0.397299	0.0267725	0.219917	0.0332596
	49	0.219448	0.0168049	0.117463	0.00592809	0.114301	0.0182081		0.227748	0.014426	0.145416	0.0162259	0.118137	0.00922014			49	0.269907	0.019845	0.26512	0.0203743	0.16678	0.0147323		0.42677	0.0492653	0.374268	0.0282744	0.245705	0.0341102
	50	0.270083	0.0233281	0.150505	0.0202547	0.135864	0.0157362		0.268843	0.016712	0.135645	0.0224367	0.125991	0.0104044			50	0.285645	0.0243124	0.280146	0.025327	0.211869	0.019143		0.418219	0.0806439	0.40081	0.0398845	0.217704	0.0285638
