# Supplementary material for: Synaptotagmin 7 docks synaptic vesicles to support facilitation and Doc2α-triggered asynchronous release
Source: eLife. 2024 Mar 27;12:RP90632. doi: 10.7554/eLife.90632 (PMC10972563; doi:10.7554/eLife.90632)
Supplement: Figure 4—source data 1. [file elife-90632-fig4-data1.xlsx]

## Sheet: Sheet1
B		WT		Doc2αKO		syt7KO		EGTA-AM			C		Total tonic charge, nC
	Stimulation No.	Mean	SEM	Mean	SEM	Mean	SEM	Mean	SEM				WT	Doc2αKO	syt7KO	EGTA-AM
	1	1	0	1	0	1	0	1	0				4.56321	0.474966	1.25325	1.98714
	2	1.26531	0.0302167	1.1698	0.0360023	0.736517	0.0401161	0.948067	0.0418778				7.20814	2.37091	1.46038	1.04585
	3	0.836148	0.0411205	0.981718	0.0452698	0.661919	0.0237522	0.845825	0.0245126				5.46174	1.68765	1.20663	0.68492
	4	0.777394	0.0520506	0.956662	0.0496937	0.642296	0.0218935	0.752621	0.0269352				4.47261	1.20794	1.53723	2.85913
	5	0.757366	0.065306	0.937501	0.0551722	0.618164	0.0276398	0.743809	0.0251442				5.94408	2.42535	2.04048	1.18161
	6	0.736416	0.0458163	0.914571	0.0543268	0.596181	0.0305934	0.729312	0.0275352				5.8988	4.04722	0.724933	1.42979
	7	0.723304	0.0514615	0.907139	0.0561638	0.584828	0.0266329	0.711115	0.0263219				5.66153	4.29378	1.36511	1.60714
	8	0.713608	0.0460811	0.892641	0.0620373	0.562174	0.0261567	0.700308	0.0282753				7.40889	0.406379	1.31493	1.92346
	9	0.705079	0.0433694	0.874218	0.0574547	0.546899	0.0412222	0.696735	0.0268718				7.13765	0.960171	1.85014	2.58674
	10	0.698706	0.0460403	0.862682	0.0591311	0.542796	0.0296103	0.682242	0.0320113				5.13292	0.603218	3.51278	0.289303
	11	0.677092	0.0375524	0.846857	0.0530557	0.529051	0.0296661	0.660242	0.0199183				3.90273	2.15512	0.702503	1.24184
	12	0.661754	0.0430499	0.832895	0.0574542	0.515572	0.0445579	0.650869	0.033604				3.92536	2.14103	0.639308	0.801865
	13	0.650792	0.0444918	0.82288	0.0488297	0.499485	0.0420999	0.641133	0.0280041				5.01292	2.68292	0.468609	2.99479
	14	0.612166	0.0491025	0.813336	0.0558707	0.488588	0.0408934	0.633629	0.0312387				5.88672	2.34358	0.403159	0.130515
	15	0.596695	0.0422616	0.794747	0.0468355	0.48201	0.0383372	0.626321	0.0271396				6.79117		4.68961	1.23538
	16	0.592388	0.0453882	0.765661	0.0542295	0.465718	0.0358027	0.613416	0.0346962						4.43347	1.04672
	17	0.575171	0.0386181	0.748318	0.0483763	0.455911	0.054952	0.600787	0.0297994						4.59546
	18	0.561018	0.0428054	0.728254	0.0536963	0.417546	0.0491248	0.586483	0.0372239
	19	0.507483	0.040167	0.7103	0.0525773	0.391151	0.048627	0.576627	0.0325436			Mean	5.627	1.986	1.894	1.44
	20	0.517101	0.0362318	0.698383	0.0572183	0.388589	0.0400128	0.532439	0.0442271			SEM	0.2971	0.3233	0.3568	0.212
	21	0.483619	0.0428583	0.685324	0.0536592	0.374794	0.0480671	0.553794	0.0332369			Dunnett's test P value		0.0002	<0.0001	<0.0001
	22	0.50186	0.0429403	0.652364	0.0562047	0.351792	0.0397724	0.535925	0.0428662					***	***	***
	23	0.468488	0.040327	0.644159	0.0526724	0.323358	0.0397646	0.516246	0.0380466
	24	0.459546	0.0421177	0.586344	0.0534124	0.321303	0.0401916	0.502002	0.0421861
	25	0.459847	0.0399835	0.564397	0.0515622	0.318988	0.0445578	0.490152	0.03854
	26	0.462064	0.0400275	0.570094	0.0489978	0.300789	0.0441089	0.472495	0.041066
	27	0.453976	0.0389058	0.522934	0.0490982	0.292693	0.0463503	0.463619	0.0366216
	28	0.455705	0.0327741	0.481781	0.0470429	0.289492	0.0449938	0.459924	0.0428936
	29	0.418344	0.0404485	0.476291	0.0457563	0.26523	0.0508492	0.420202	0.0429508
	30	0.404218	0.0374203	0.470514	0.0476762	0.243074	0.0334531	0.416516	0.0405776
	31	0.379402	0.0410018	0.439708	0.0446256	0.236851	0.0394067	0.393448	0.0416872
	32	0.39659	0.0348637	0.43643	0.0437704	0.217404	0.0373937	0.406224	0.0410881
	33	0.392743	0.0347642	0.437123	0.0473383	0.204601	0.0312346	0.389903	0.0411987
	34	0.393246	0.0389428	0.4254	0.0468093	0.21128	0.0346441	0.401174	0.0378943
	35	0.422117	0.0393889	0.410383	0.0440032	0.199269	0.0479857	0.412235	0.0444223
	36	0.424735	0.0367756	0.426669	0.0494693	0.214337	0.0327407	0.418443	0.0401186
	37	0.384213	0.0310855	0.400024	0.0423359	0.18205	0.031903	0.399055	0.0395471
	38	0.384261	0.0326813	0.418184	0.0433828	0.19408	0.026489	0.392574	0.0377466
	39	0.363107	0.0308081	0.420898	0.043959	0.188458	0.0305761	0.383323	0.039396
	40	0.383427	0.0349905	0.428266	0.0449679	0.178366	0.0246666	0.388754	0.0392339
	41	0.372934	0.0345627	0.411577	0.0459263	0.170331	0.0291679	0.399061	0.0419048
	42	0.366113	0.0339732	0.40111	0.0456036	0.154933	0.0273161	0.38581	0.0366249
	43	0.397827	0.0349097	0.409791	0.0392903	0.176633	0.0261448	0.394309	0.0333474
	44	0.347841	0.0309591	0.408629	0.0456119	0.175861	0.0293959	0.37578	0.0347992
	45	0.368307	0.031774	0.414058	0.0434916	0.176694	0.0263887	0.379289	0.0353478
	46	0.351724	0.0290062	0.427064	0.0442132	0.168826	0.0290244	0.385967	0.0375567
	47	0.370891	0.0327886	0.417958	0.038557	0.168154	0.0279117	0.382225	0.0354437
	48	0.380369	0.0328599	0.418126	0.0473648	0.169039	0.0265765	0.383524	0.0334464
	49	0.350934	0.0317011	0.41839	0.0397128	0.170234	0.0272734	0.379884	0.0326984
	50	0.335813	0.0324205	0.416308	0.043937	0.176511	0.0258606	0.384368	0.0333559
