# Supplementary material for: Synaptotagmin 7 docks synaptic vesicles to support facilitation and Doc2α-triggered asynchronous release
Source: eLife. 2024 Mar 27;12:RP90632. doi: 10.7554/eLife.90632 (PMC10972563; doi:10.7554/eLife.90632)
Supplement: Figure 8—figure supplement 1—source data 1. [file elife-90632-fig8-figsupp1-data1.xlsx]

## Sheet: Sheet1
	WT		Doc2αKO		syt7KO		EGTA-AM		Doc2α/syt7 DKO
Stimulation No.	Mean	SEM	Mean	SEM	Mean	SEM	Mean	SEM	Mean	SEM
1	1	0	1	0	1	0	1	0	1	0
2	1.26531	0.0302167	1.1698	0.0360023	0.736517	0.0401161	0.948067	0.0418778	0.929927	0.0271064
3	0.836148	0.0411205	0.981718	0.0452698	0.661919	0.0237522	0.845825	0.0245126	0.904925	0.0307533
4	0.777394	0.0520506	0.956662	0.0496937	0.642296	0.0218935	0.752621	0.0269352	0.885003	0.0291957
5	0.757366	0.065306	0.937501	0.0551722	0.618164	0.0276398	0.743809	0.0251442	0.806042	0.0252976
6	0.736416	0.0458163	0.914571	0.0543268	0.596181	0.0305934	0.729312	0.0275352	0.80177	0.018155
7	0.723304	0.0514615	0.907139	0.0561638	0.584828	0.0266329	0.711115	0.0263219	0.74127	0.0322423
8	0.713608	0.0460811	0.892641	0.0620373	0.562174	0.0261567	0.700308	0.0282753	0.713315	0.0307641
9	0.705079	0.0433694	0.874218	0.0574547	0.546899	0.0412222	0.696735	0.0268718	0.699882	0.0260279
10	0.698706	0.0460403	0.862682	0.0591311	0.542796	0.0296103	0.682242	0.0320113	0.670719	0.029196
11	0.677092	0.0375524	0.846857	0.0530557	0.529051	0.0296661	0.660242	0.0199183	0.64245	0.0285763
12	0.661754	0.0430499	0.832895	0.0574542	0.515572	0.0445579	0.650869	0.033604	0.637317	0.0344021
13	0.650792	0.0444918	0.82288	0.0488297	0.499485	0.0420999	0.641133	0.0280041	0.614388	0.0320826
14	0.612166	0.0491025	0.813336	0.0558707	0.488588	0.0408934	0.633629	0.0312387	0.577294	0.0314328
15	0.596695	0.0422616	0.794747	0.0468355	0.48201	0.0383372	0.626321	0.0271396	0.579167	0.0403859
16	0.592388	0.0453882	0.765661	0.0542295	0.465718	0.0358027	0.613416	0.0346962	0.55196	0.0408515
17	0.575171	0.0386181	0.748318	0.0483763	0.455911	0.054952	0.600787	0.0297994	0.516547	0.0499663
18	0.561018	0.0428054	0.728254	0.0536963	0.417546	0.0491248	0.586483	0.0372239	0.464758	0.0475624
19	0.507483	0.040167	0.7103	0.0525773	0.391151	0.048627	0.576627	0.0325436	0.47255	0.0503917
20	0.517101	0.0362318	0.698383	0.0572183	0.388589	0.0400128	0.532439	0.0442271	0.452731	0.046393
21	0.483619	0.0428583	0.685324	0.0536592	0.374794	0.0480671	0.553794	0.0332369	0.423898	0.0496472
22	0.50186	0.0429403	0.652364	0.0562047	0.351792	0.0397724	0.535925	0.0428662	0.394276	0.0466187
23	0.468488	0.040327	0.644159	0.0526724	0.323358	0.0397646	0.516246	0.0380466	0.391847	0.0389242
24	0.459546	0.0421177	0.586344	0.0534124	0.321303	0.0401916	0.502002	0.0421861	0.383246	0.0452495
25	0.459847	0.0399835	0.564397	0.0515622	0.318988	0.0445578	0.490152	0.03854	0.339785	0.0467709
26	0.462064	0.0400275	0.570094	0.0489978	0.300789	0.0441089	0.472495	0.041066	0.336623	0.0458095
27	0.453976	0.0389058	0.522934	0.0490982	0.292693	0.0463503	0.463619	0.0366216	0.332455	0.0479117
28	0.455705	0.0327741	0.481781	0.0470429	0.289492	0.0449938	0.459924	0.0428936	0.319262	0.0510424
29	0.418344	0.0404485	0.476291	0.0457563	0.26523	0.0508492	0.420202	0.0429508	0.284133	0.0465052
30	0.404218	0.0374203	0.470514	0.0476762	0.243074	0.0334531	0.416516	0.0405776	0.280237	0.0390912
31	0.379402	0.0410018	0.439708	0.0446256	0.236851	0.0394067	0.393448	0.0416872	0.239226	0.0415629
32	0.39659	0.0348637	0.43643	0.0437704	0.217404	0.0373937	0.406224	0.0410881	0.240092	0.0385992
33	0.392743	0.0347642	0.437123	0.0473383	0.204601	0.0312346	0.389903	0.0411987	0.208937	0.0338002
34	0.393246	0.0389428	0.4254	0.0468093	0.21128	0.0346441	0.401174	0.0378943	0.198637	0.0406395
35	0.422117	0.0393889	0.410383	0.0440032	0.199269	0.0479857	0.412235	0.0444223	0.19848	0.0403694
36	0.424735	0.0367756	0.426669	0.0494693	0.214337	0.0327407	0.418443	0.0401186	0.197908	0.0391532
37	0.384213	0.0310855	0.400024	0.0423359	0.18205	0.031903	0.399055	0.0395471	0.173642	0.0325028
38	0.384261	0.0326813	0.418184	0.0433828	0.19408	0.026489	0.392574	0.0377466	0.183914	0.0285131
39	0.363107	0.0308081	0.420898	0.043959	0.188458	0.0305761	0.383323	0.039396	0.173626	0.0328841
40	0.383427	0.0349905	0.428266	0.0449679	0.178366	0.0246666	0.388754	0.0392339	0.149679	0.0279494
41	0.372934	0.0345627	0.411577	0.0459263	0.170331	0.0291679	0.399061	0.0419048	0.129142	0.0223139
42	0.366113	0.0339732	0.40111	0.0456036	0.154933	0.0273161	0.38581	0.0366249	0.153784	0.0304634
43	0.397827	0.0349097	0.409791	0.0392903	0.176633	0.0261448	0.394309	0.0333474	0.135468	0.0299465
44	0.347841	0.0309591	0.408629	0.0456119	0.175861	0.0293959	0.37578	0.0347992	0.127434	0.0250355
45	0.368307	0.031774	0.414058	0.0434916	0.176694	0.0263887	0.379289	0.0353478	0.116412	0.026217
46	0.351724	0.0290062	0.427064	0.0442132	0.168826	0.0290244	0.385967	0.0375567	0.100364	0.0269114
47	0.370891	0.0327886	0.417958	0.038557	0.168154	0.0279117	0.382225	0.0354437	0.115608	0.0251359
48	0.380369	0.0328599	0.418126	0.0473648	0.169039	0.0265765	0.383524	0.0334464	0.0963717	0.027159
49	0.350934	0.0317011	0.41839	0.0397128	0.170234	0.0272734	0.379884	0.0326984	0.107166	0.0264707
50	0.335813	0.0324205	0.416308	0.043937	0.176511	0.0258606	0.384368	0.0333559	0.0842264	0.026341
