# Supplementary material for: Synaptotagmin 7 docks synaptic vesicles to support facilitation and Doc2α-triggered asynchronous release
Source: eLife. 2024 Mar 27;12:RP90632. doi: 10.7554/eLife.90632 (PMC10972563; doi:10.7554/eLife.90632)
Supplement: Figure 8—source data 1. [file elife-90632-fig8-data1.xlsx]

## Sheet: Sheet1
B		Slow EPSC charge, pC						D		Total tonic charge, nC
		WT	Doc2αKO	syt7KO	EGTA-AM	syt7 / Doc2α DKO				WT	Doc2αKO	syt7KO	EGTA-AM	syt7 / Doc2α DKO
		7.58985	2.78265	3.97797	1.77146	1.86042				4.56321	0.474966	1.25325	1.98714	2.78801
		6.23621	2.75002	5.17584	1.73507	2.68586				7.20814	2.37091	1.46038	1.04585	0.204323
		6.73974	3.16054	4.39153	2.40303	2.16113				5.46174	1.68765	1.20663	0.68492	1.56249
		4.82879	3.59954	5.70359	1.1419	3.21714				4.47261	1.20794	1.53723	2.85913	2.81281
		6.06955	3.828	5.02772	1.22639	2.23316				5.94408	2.42535	2.04048	1.18161	1.25964
		8.8933	3.81506	7.78234	1.29476	3.91609				5.8988	4.04722	0.724933	1.42979	3.73794
		6.56211	4.02251	7.64149	1.66459	2.40996				5.66153	4.29378	1.36511	1.60714	0.420738
		6.41836	1.74872	3.73705	2.41335	2.01115				7.40889	0.406379	1.31493	1.92346	1.97104
		4.79693	1.96817	6.82036	2.36572	1.85282				7.13765	0.960171	1.85014	2.58674	0.29616
		6.23783	1.30225	4.71104	1.1028	3.10172				5.13292	0.603218	3.51278	0.289303	3.12685
		6.99474	1.26257	5.40276	1.67874	2.73055				3.90273	2.15512	0.702503	1.24184	0.32068
		7.30316	2.28702	5.96542	1.89569	2.41431				3.92536	2.14103	0.639308	0.801865	1.91603
		5.71489	2.2178	7.74232	1.70856	1.4516				5.01292	2.68292	0.468609	2.99479	3.16986
		5.55765	1.9871	5.37985	2.11666	3.02169				5.88672	2.34358	0.403159	0.130515	1.22503
		9.0327	2.0875	7.92374	2.06755					6.79117		4.68961	1.23538
		3.71134		4.85655	1.49637							4.43347	1.04672
		8.45694		6.65494	1.73381							4.59546
		8.61441		6.49852	1.02633
		7.95863		5.92607	2.67291				Mean	5.627	1.986	1.894	1.44	1.772
		4.05279		6.64147	1.28419				SEM	0.2971	0.3233	0.3568	0.212	0.3231
									Dunnett's test P value		0.0002	<0.0001	<0.0001	<0.0001
	Mean	6.588	2.588	5.898	1.74	2.505					***	***	***	***
	SEM	0.3473	0.2376	0.2874	0.1081	0.1755
	Dunnett's test P value		<0.0001	0.4288	<0.0001	<0.0001
			***		***	***
